# Supplementary material
Source: PubMed Central journal article supplement (PMC3392993)

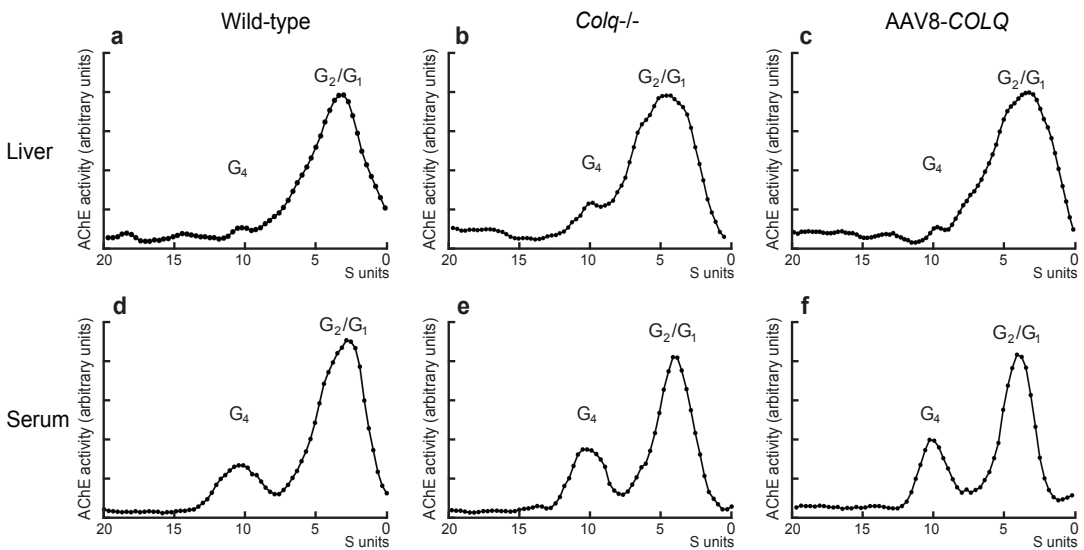

Supplement: mt201234x1.pdf [file mt201234x1.pdf]
